# Supplementary material for: A simple and rapid approach for testing enantiopurity of hydroxy acids and their derivatives using 1H NMR spectroscopy
Source: Royal Society of Chemistry journal article supplement (doi:10.1039/c5ra11919g), 2015-01-01
Supplement: c5ra11919g1.pdf [file c5ra11919g1.pdf]

## SUPPORTING INFORMATION

# A Simple and Rapid Approach for Testing Enantiopurity of Hydroxy acids and their Derivatives using $^1\text{H}$ NMR Spectroscopy

Sandeep Kumar Mishra and N. Suryaprakash

NMR Research Centre, Solid State and Structural Chemistry Unit,  
Indian Institute of Science, Bangalore-560012

\*Corresponding Author

e-mail: [nsp@nrc.iisc.ernet.in](mailto:nsp@nrc.iisc.ernet.in)

Tel: 0091 80 22933300, 919845124802

Fax: 0091 8023601550

## Contents

1. General Scheme of the coupling reaction
2. **Fig.1S.**  $^{11}\text{B}$  NMR spectra:
  - (A) 2-formylphenyl boronic acid
  - (C) Amino-binaphthalene-benzoazaborole complex
  - (E) Iminoboronate ester complex with mandelic acid
3. **Fig.2S** 400 MHz NMR spectra of *R/S*-Mandelic acid in iminoboronate complex
  - (X)  $^1\text{H}$
  - (Y)  $^1\text{H}$ - $^{13}\text{C}$ -HSQC
4. **Fig.3S** 400 MHz NMR spectra of *R/S*-4-trifluoromethyl Mandelic acid in iminoboronate complex
  - (X)  $^1\text{H}$
  - (Y)  $^1\text{H}$ - $^{13}\text{C}$ -HSQC
5. **Fig.4S** 400MHz NMR spectra of *R/S*-3,4-(Methylenedioxy)mandelic acid in iminoboronate complex
  - (X)  $^1\text{H}$
  - (Y)  $^1\text{H}$ - $^{13}\text{C}$ -HSQC
6. **Fig.5S** 400 MHz NMR spectra of *R/S*-2-hydroxy-3-methyl-butyric acid in the iminoboronate complex
  - (X)  $^1\text{H}$
  - (Y)  $^1\text{H}$ - $^{13}\text{C}$ -HSQC
7. **Fig.6S** 400 MHz NMR spectra of *R/S*-Methyl-2,3-dihydroxy-3-phenyl propionate in the iminoboronate complex
  - (X)  $^1\text{H}$
  - (Y)  $^1\text{H}$ - $^{13}\text{C}$ -HSQC
8. **Fig.7S.** 400 MHz  $^{11}\text{B}$  NMR spectra of iminoboronate ester complex with:

(a) Mandelic acid (b) 2-Cl-mandelic acid (c) 4-Br--mandelic acid (d) 4-trifluoromethyl mandelic acid (e) 3,4-(Methylenedioxy)mandelic acid (f) 2-hydroxy-3-methyl butyric acid (g) Methyl-2,3-dihydroxy-3-phenyl propionate (h) Malic acid

**Scheme.**

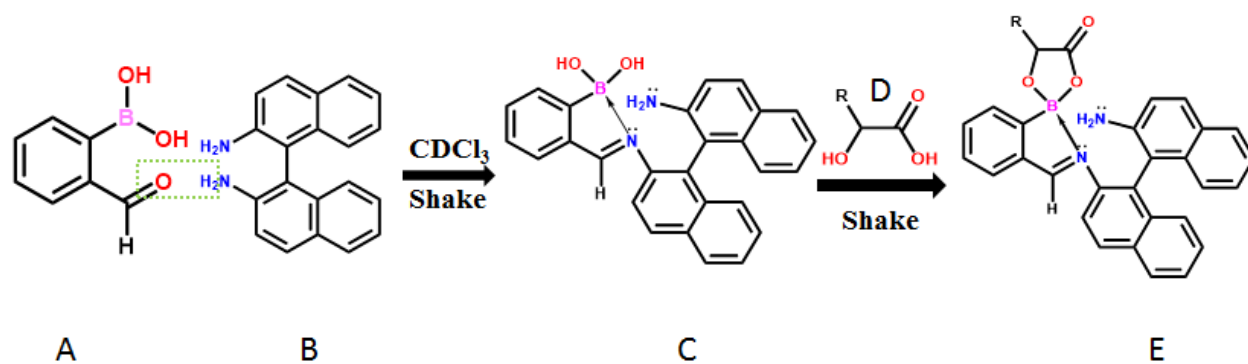

**Scheme.1S:** The stepwise general scheme for the coupling reaction.

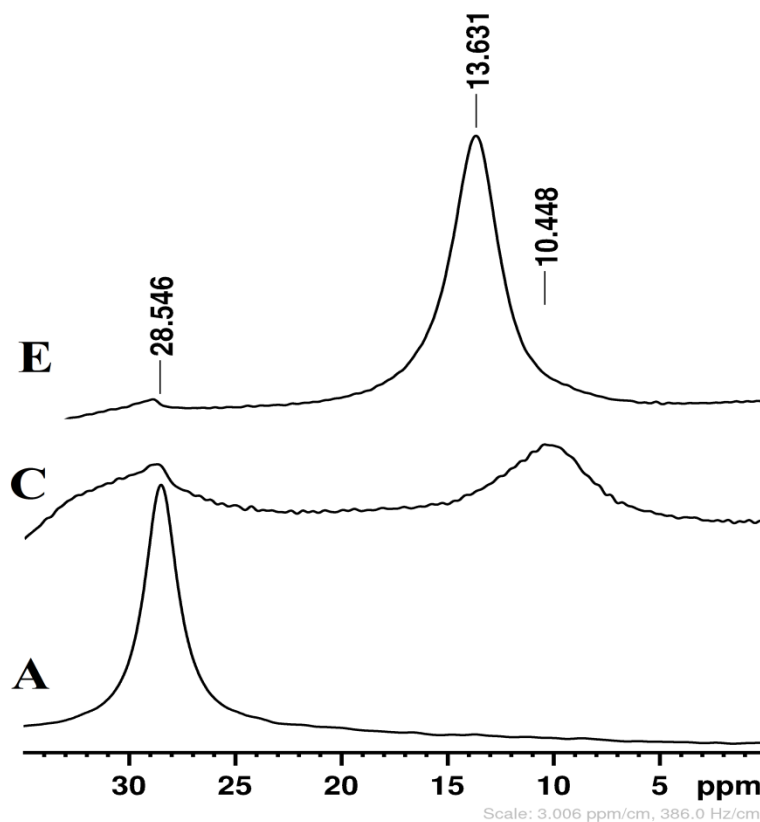

**Fig.1S.**  $^{11}\text{B}$  NMR spectra of (A) 2-formylphenyl boronic acid (C) Amino-binaphthalene-benzoazaborole complex and (E) Iminoboronate ester complex with mandelic acid acquired on 400 MHz NMR spectrometer.

In the  $^{11}\text{B}$  NMR spectrum of 2-formylphenylboronic acid a peak was detected at 28.55 ppm. The deshielding is due to the electron deficiency of three-coordinated Boron atom. On complexation with [1,1-binaphthalene]-2,2-diamine boron atom become tetra-coordinated. As a consequence the peak in  $^{11}\text{B}$  NMR spectrum is shifted to 10.45 ppm. Again on complexation with the acid some change in the electronic environment is observed and the  $^{11}\text{B}$  NMR peak appeared at 13.63 ppm.

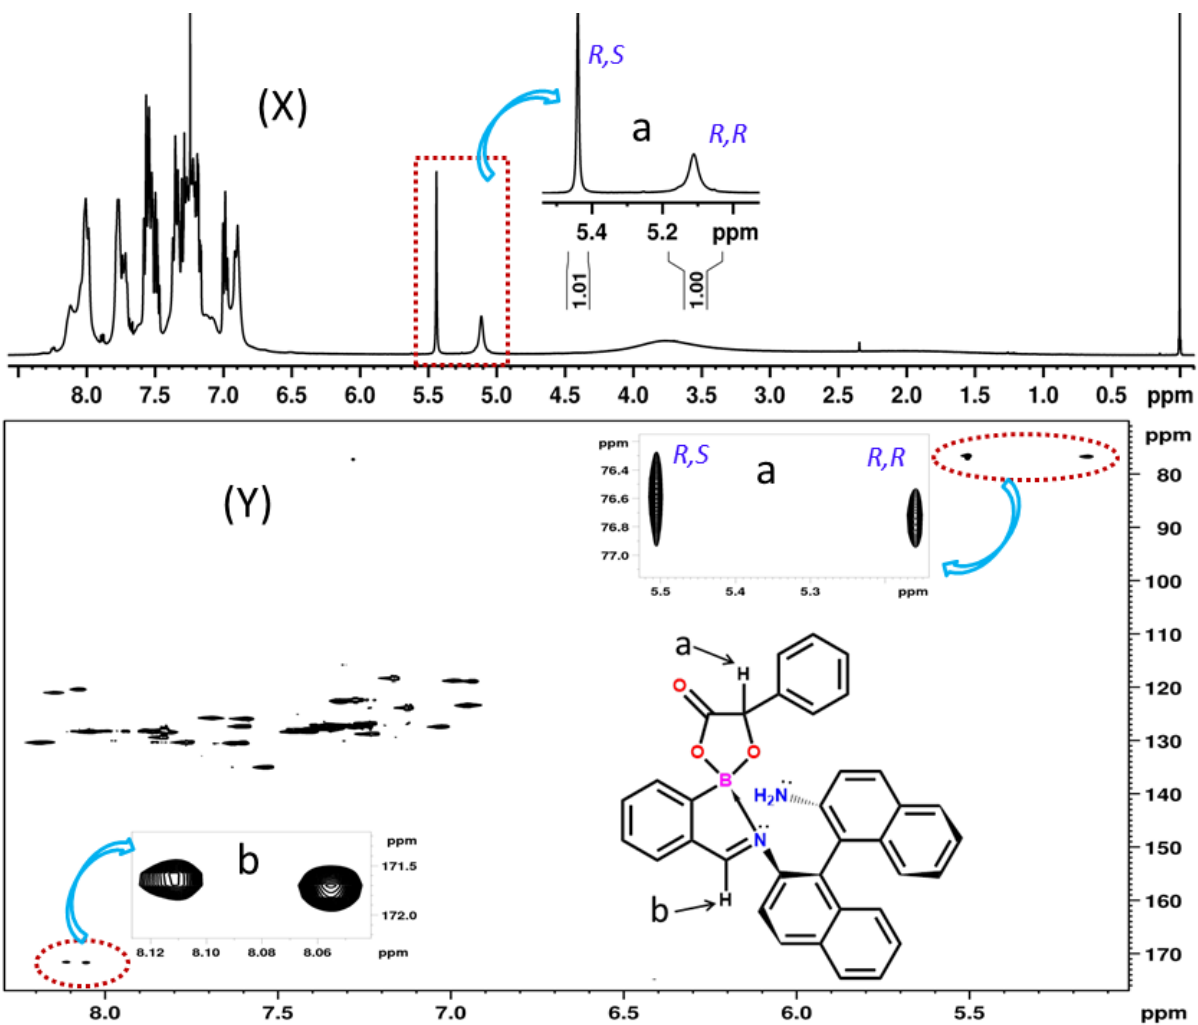

**Fig.2S.** 400 MHz (X)  $^1\text{H}$  and (Y)  $^1\text{H}$ - $^{13}\text{C}$ -HSQC NMR spectrum of *R/S*-Mandelic acid in iminoboronate complex E. The discriminated peaks are marked inside the dotted circle and expanded region is given as an inset.

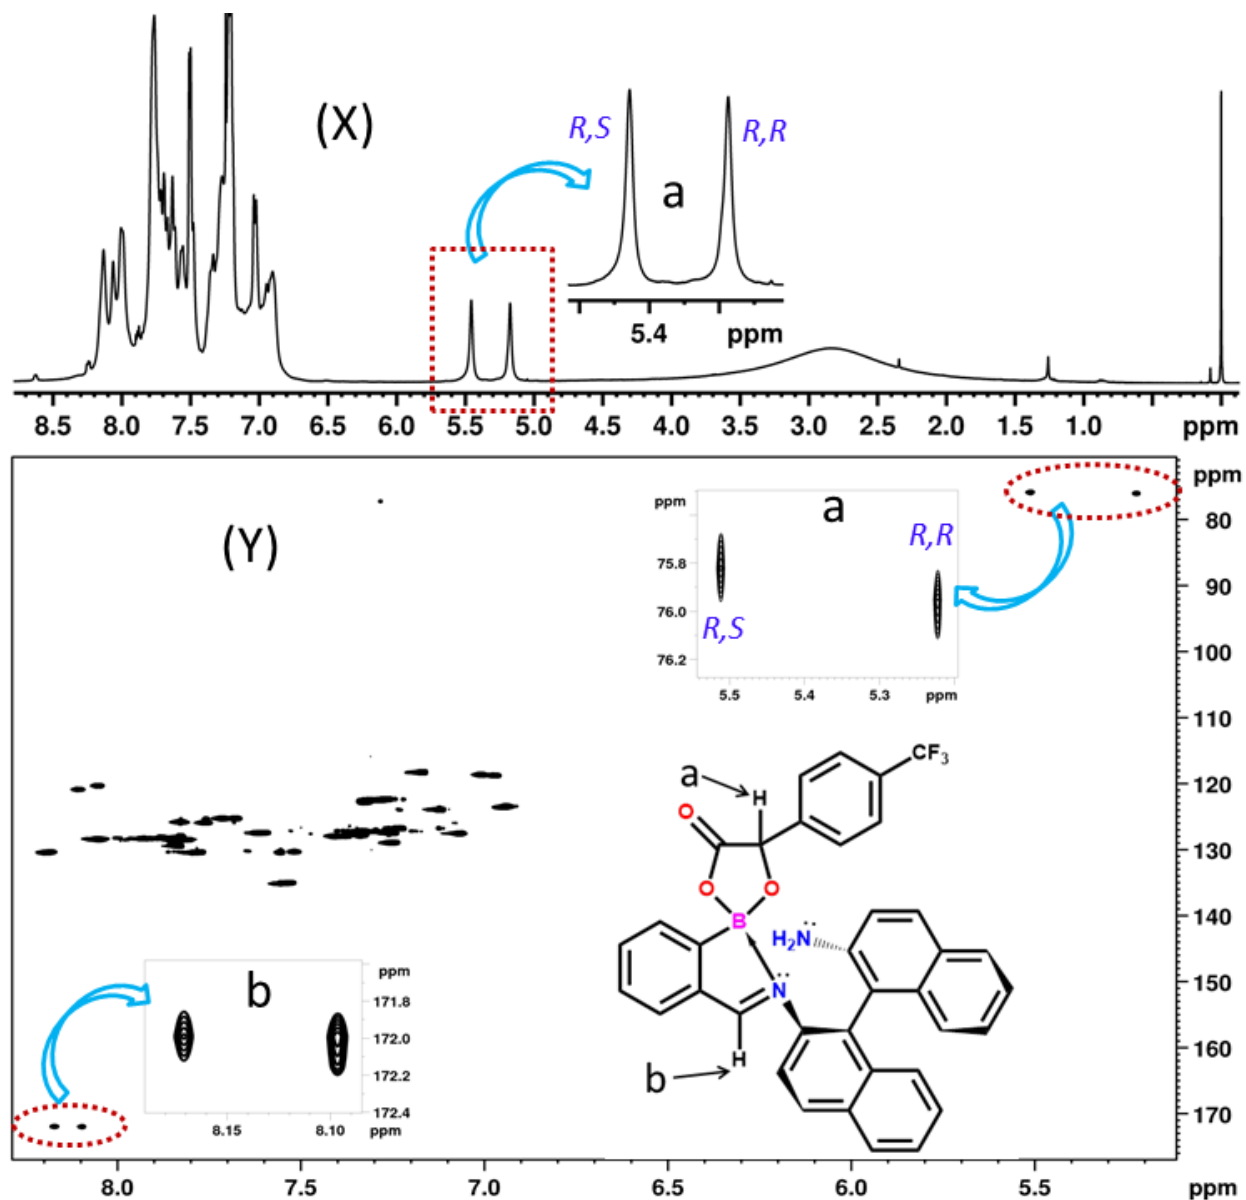

**Fig.3S.** 400 MHz (X)  $^1\text{H}$  and (Y)  $^1\text{H}$ - $^{13}\text{C}$ -HSQC NMR spectrum of *R/S*-4-trifluoromethyl Mandelic acid in iminoboronate complex E. The discriminated peaks are marked inside the dotted circle and expanded region is given as an inset.

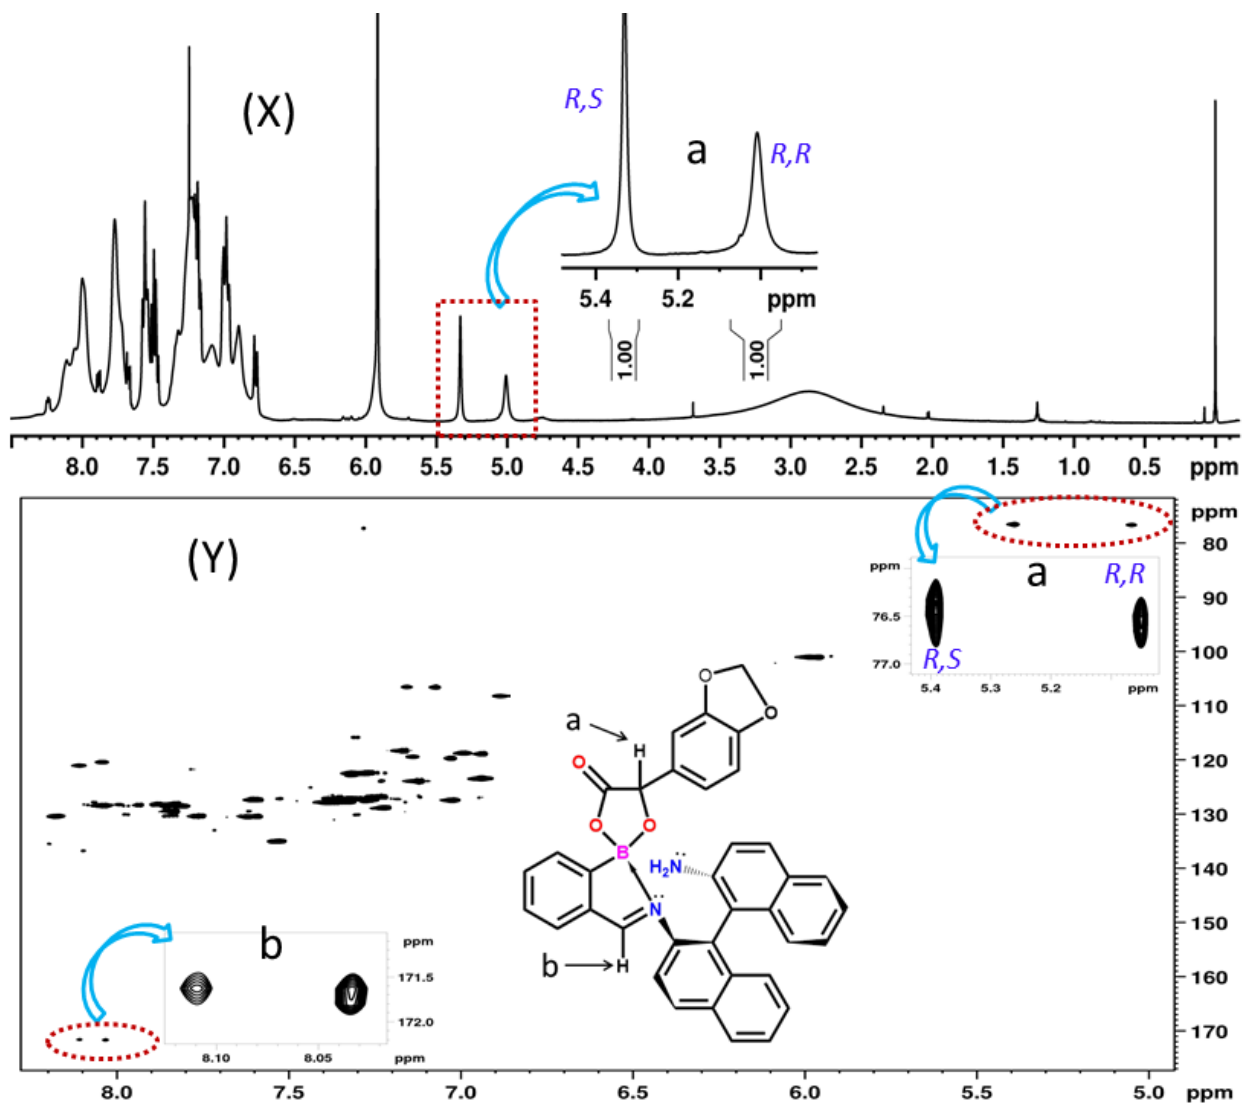

**Fig.4S.** 400 MHz (X)  $^1\text{H}$  and (Y)  $^1\text{H}$ - $^{13}\text{C}$ -HSQC NMR spectrum of *R/S*-3,4-(Methylenedioxy)mandelic acid in iminoboronate complex E. The discriminated peaks are marked inside the dotted circle and expanded region is given as an inset.



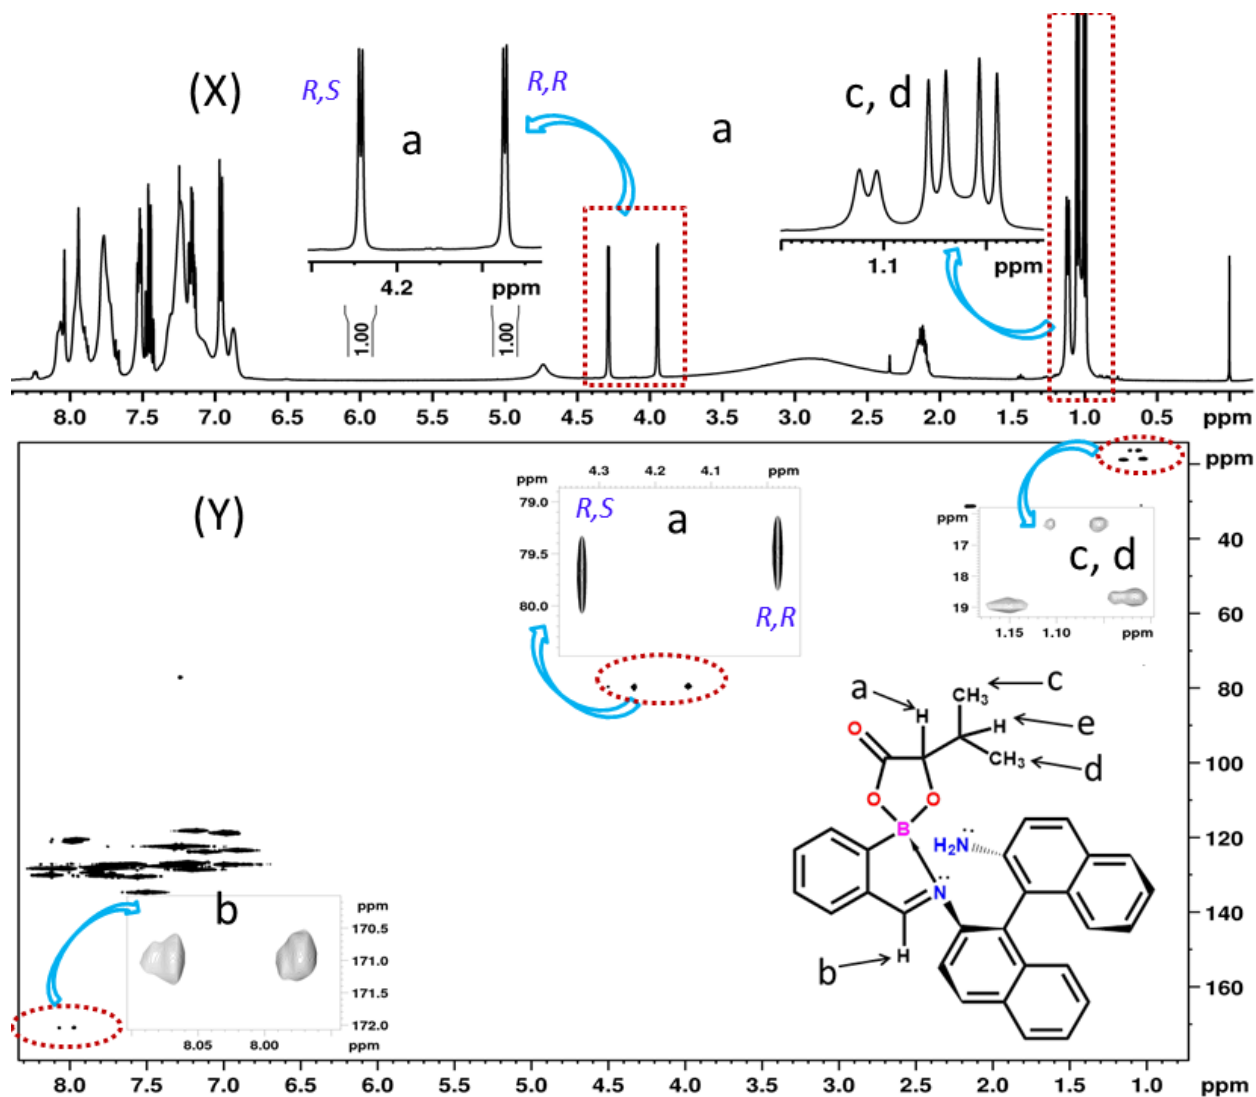

**Fig.5S.** 400 MHz (X)  $^1\text{H}$  and (Y)  $^1\text{H}$ - $^{13}\text{C}$ -HSQC NMR spectra of *R/S*-2-hydroxy-3-methylbutyric acid in the iminoboronate complex E. The discriminated peaks are marked inside the dotted circle and expanded region is given as an inset.

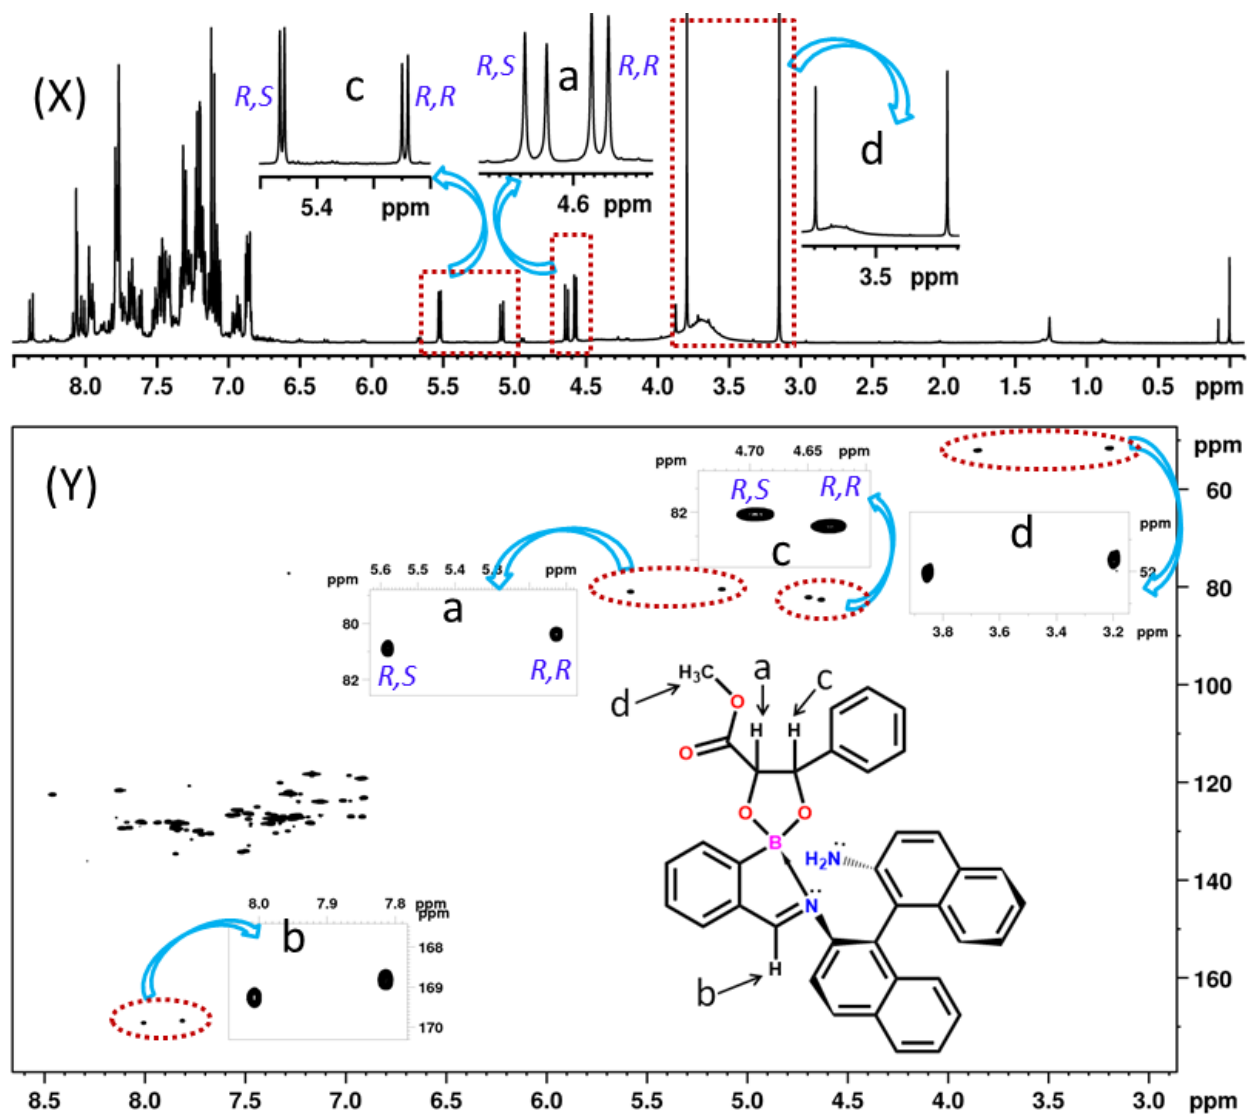

**Fig.6S.** 400 MHz (X)  $^1\text{H}$  and (Y)  $^1\text{H}$ - $^{13}\text{C}$ -HSQC NMR spectra of *R/S*-Methyl-2,3-dihydroxy-3-phenyl propionate in the iminoboronate complex E. The discriminated peaks are marked inside the dotted circle and expanded region is given as an inset.

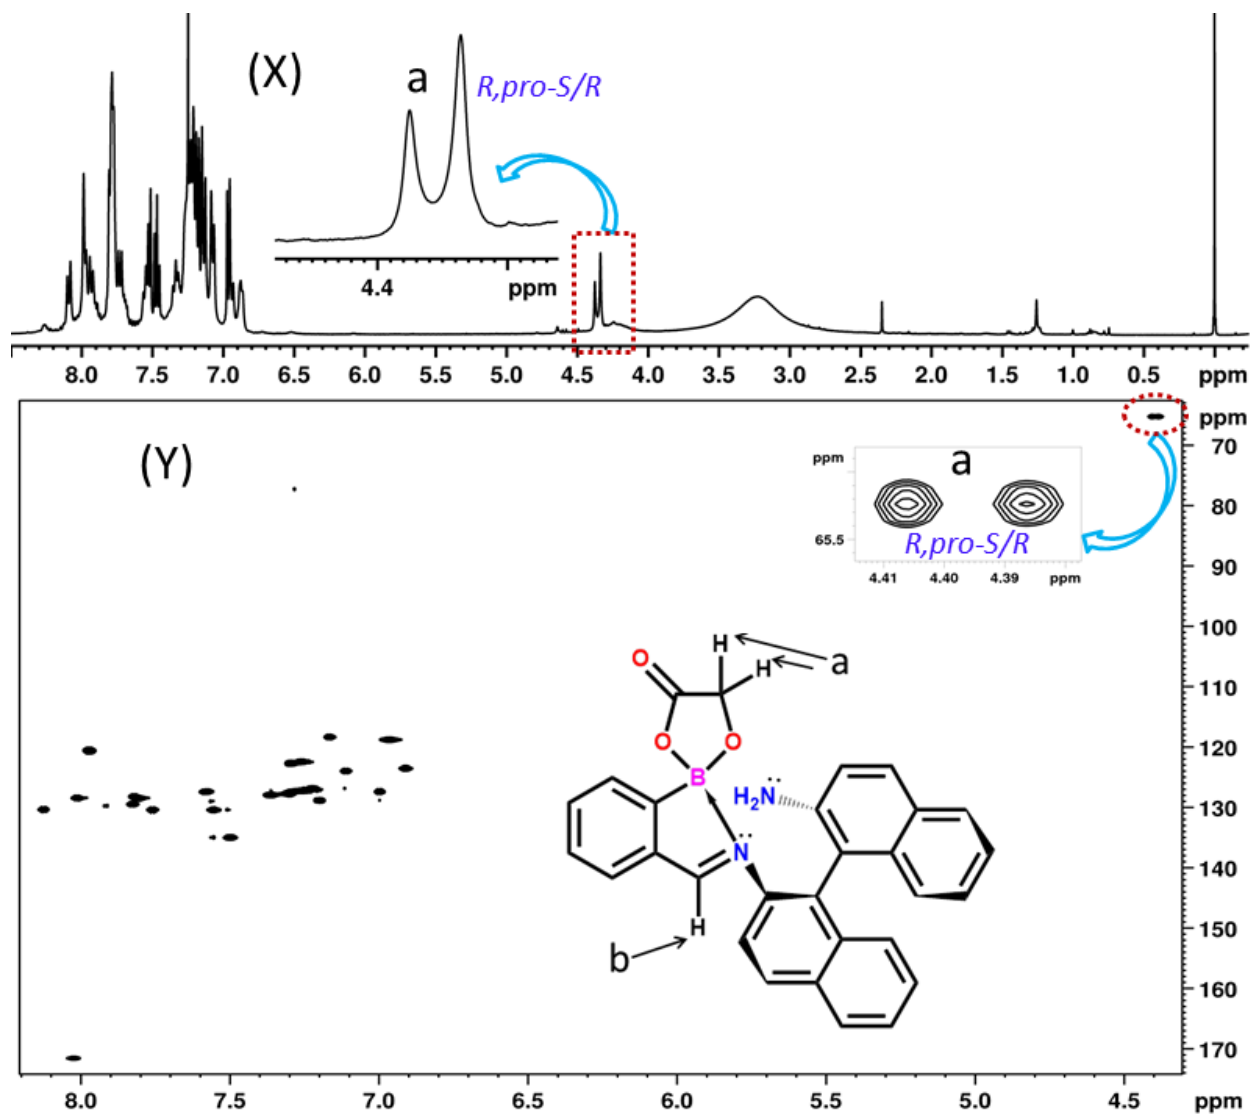

**Fig.7S.** 400 MHz (X)  $^1\text{H}$  and (Y)  $^1\text{H}$ - $^{13}\text{C}$ -HSQC NMR spectra of *R/S*-Glyconic acid in the iminoboronate complex E. The discriminated peaks are marked inside the dotted circle and expanded region is given as an inset.

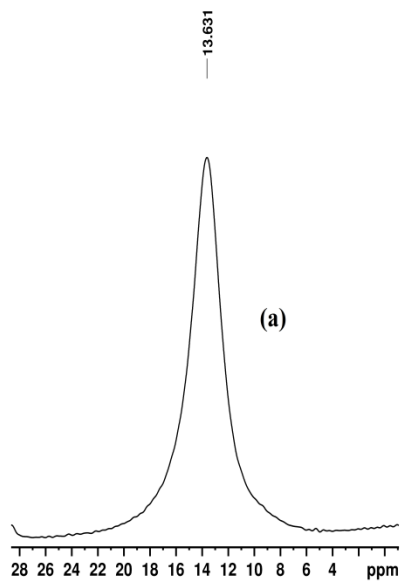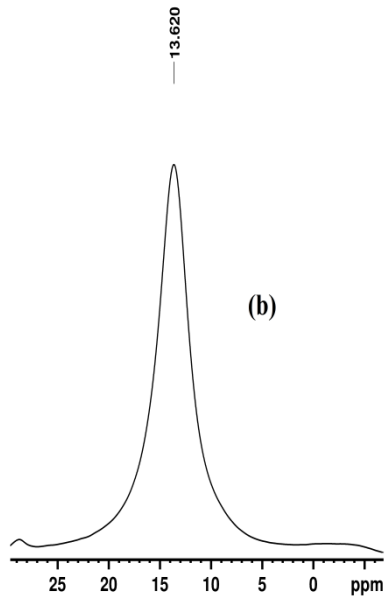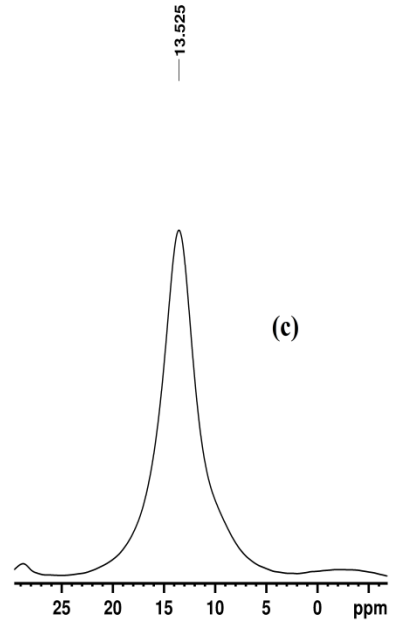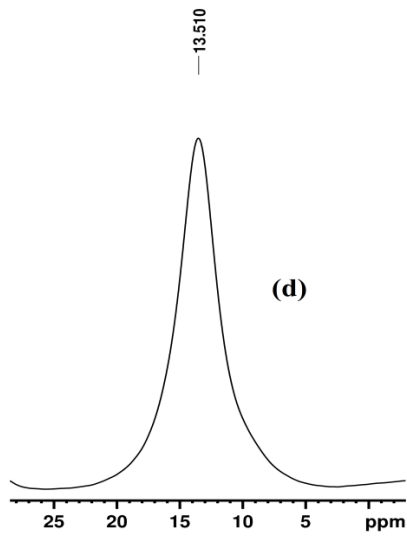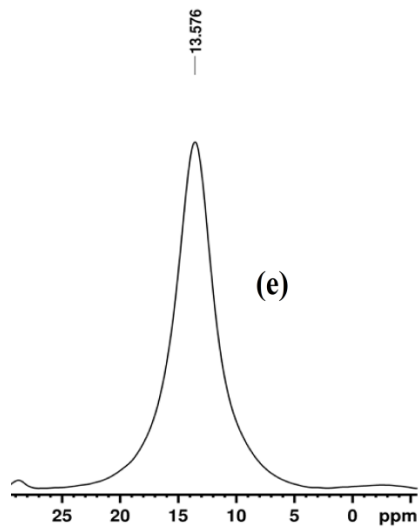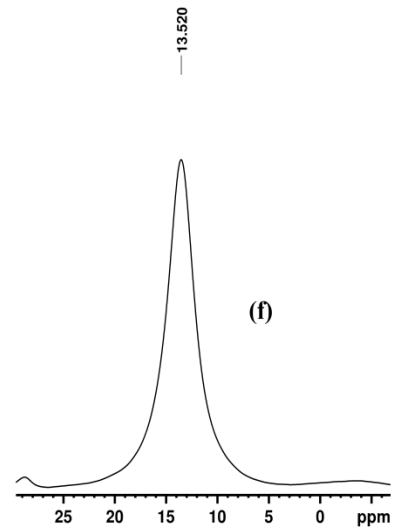

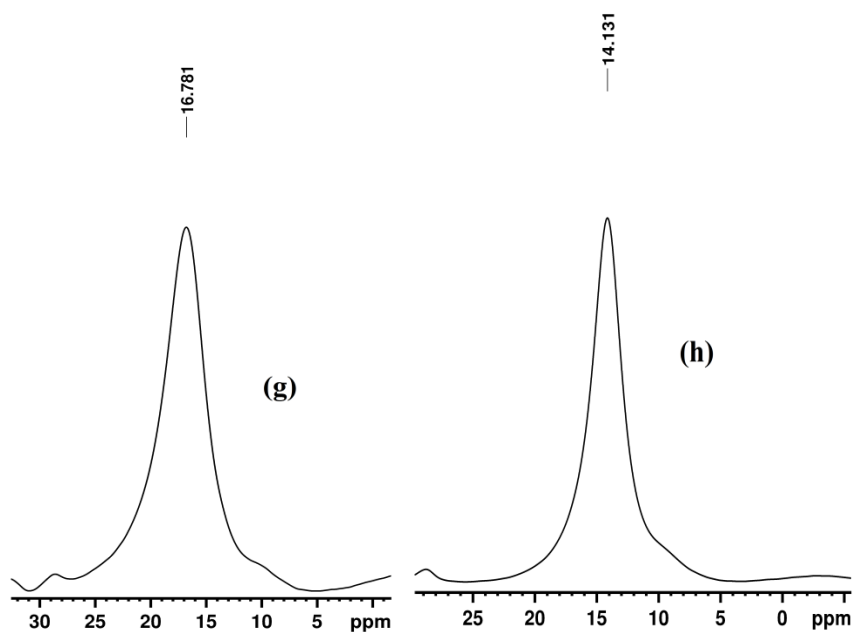

**Fig.8S.**  $^{11}\text{B}$  NMR spectra of iminoboronate ester complex with (a) Mandelic acid (b) 2-Cl-mandelic acid (c) 4-Br--mandelic acid (d) 4-trifluoromethyl mandelic acid (e) 3,4-(Methylenedioxy)mandelic acid (f) 2-hydroxy-3-methyl butyric acid (g) Methyl-2,3-dihydroxy-3-phenyl propionate (h) Malic acid are acquired at 400 MHz NMR spectrometer.
